# Supplementary material for: Synthesis and Study of Chemical, Thermal, Mesomorphic, and Optical Properties of Terphenyls Modified with Nitrile Groups
Source: Hindawi journal article supplement (doi:10.1155/2017/8275489), 2017-01-01
Supplement: f1 [file 8275489.f1.docx]

Synthesis and study of chemical, thermal, mesomorphic and optical properties of terphenyls modified with nitrile groups

María L. Mota, 1, 2* Amanda Carrillo,2 Roberto C. Ambrosio,3 Javier Flores,3 Mario Moreno,4 Priscy A. Luque,5 & Dámaso Navarro6

1 CONACYT- Universidad Autónoma de Ciudad Juárez, C.P 32310, Ciudad Juárez, Chihuahua

México; [mdllmotago@conacyt.mx](mailto:mdllmotago@conacyt.mx)

2 Instituto de Ingeniería y Tecnología, Universidad Autónoma de Ciudad Juárez, Ave. Del Charro 610, C. P

32310, Ciudad Juárez, Chihuahua, México; amanda.carrillo@uacj.mx

3 Faculty of Electronics, Benemérita Universidad Autónoma de Puebla, C.P 72000, Puebla, México; [roberto.ambrosio@correo.buap.mx](mailto:roberto.ambrosio@correo.buap.mx) , xavier_snk@hotmail.com

4 Electronics Department, National Institute of Astrophysics, Optics and Electronics, CP 72840, Sta. Ma.

Tonantzintla, Puebla, Mexico; [mmoreno@inaoep.mx](mailto:mmoreno@inaoep.mx)

5Universidad Autónoma de Baja California FIAD, C.P 22860, Ensenada B. C. México;[pluque@uabc.edu.mx](mailto:pluque@uabc.edu.mx)

6 Centro de Investigación en Química Aplicada, Blvd. Enrique Reyna H. No.140, C.P. 25294 Saltillo Coahuila,

México; damaso.navarro@ciqa.edu.mx

***** Correspondance : mdllmotago@conacyt.mx; Tel.: 656 112 70 65.

The **1H NMR** Spectra of p**recursors and** terphenyls allowed to verify the structure and purity

Scheme S1.Precursors (**1** - **6)** and terphenyls with (T12-CN and T12-2CN) and without (T12) cyano groups.

R = dodecyl chain.

Figure S1.1H NMR spectra for precursors. Precursors I, III and V in CDCl3, IV In TDF and VI in Methanol-D4

***** Correspondance : mdllmotago@conacyt.mx; Tel.: 656 112 70 65. The**PL** Spectra of T12CN terphenyl deposited by spin coating and drop casting technique and measurements parameters by photoluminescence.

**Measurements parameters:**

In order to avoid the effects of substrate in the PL measurements and scattering bands, the terphenyl T12-CN as thin film were deposited on Silicon wafer substrates, since; bulk silicon has an indirect band gap (1.11 eV at room temperature) and does not emit visible light. Thus the PL emission measured is only due to the material properties of terphenyl (Figure S2).

Measurements made in the thin films deposited on glass substrates and a comparison with a measure of the spectra of pure glass substrate without terphenyl T12-CN is presented (Figure 8 in the manuscript), in order to make obvious that there is no significant contribution in the measurements the effect of scattering of the glass substrate

Also the measurements made with excitation wavelength at 300 nm were changed to 330 nm and the two bands are presented (Figure S3).

Figure S2. Photoluminescence spectra of T12-CN p-terphenyl deposited by spin coating and drop casting on silicon substrate.

Figure S3. Photoluminescence spectra of T12-CN p-terphenyl deposited by spin coating on glass substrate.
